# Supplementary material for: SOX2 functions as a molecular rheostat to control the growth, tumorigenicity and drug responses of pancreatic ductal adenocarcinoma cells
Source: PubMed Central journal article supplement (PMC5085197; doi:10.18632/oncotarget.8994), 2016-04-26
Supplement: oncotarget-07-34890-s001.pdf [file oncotarget-07-34890-s001.pdf]

## SUPPLEMENTARY FIGURES AND TABLE

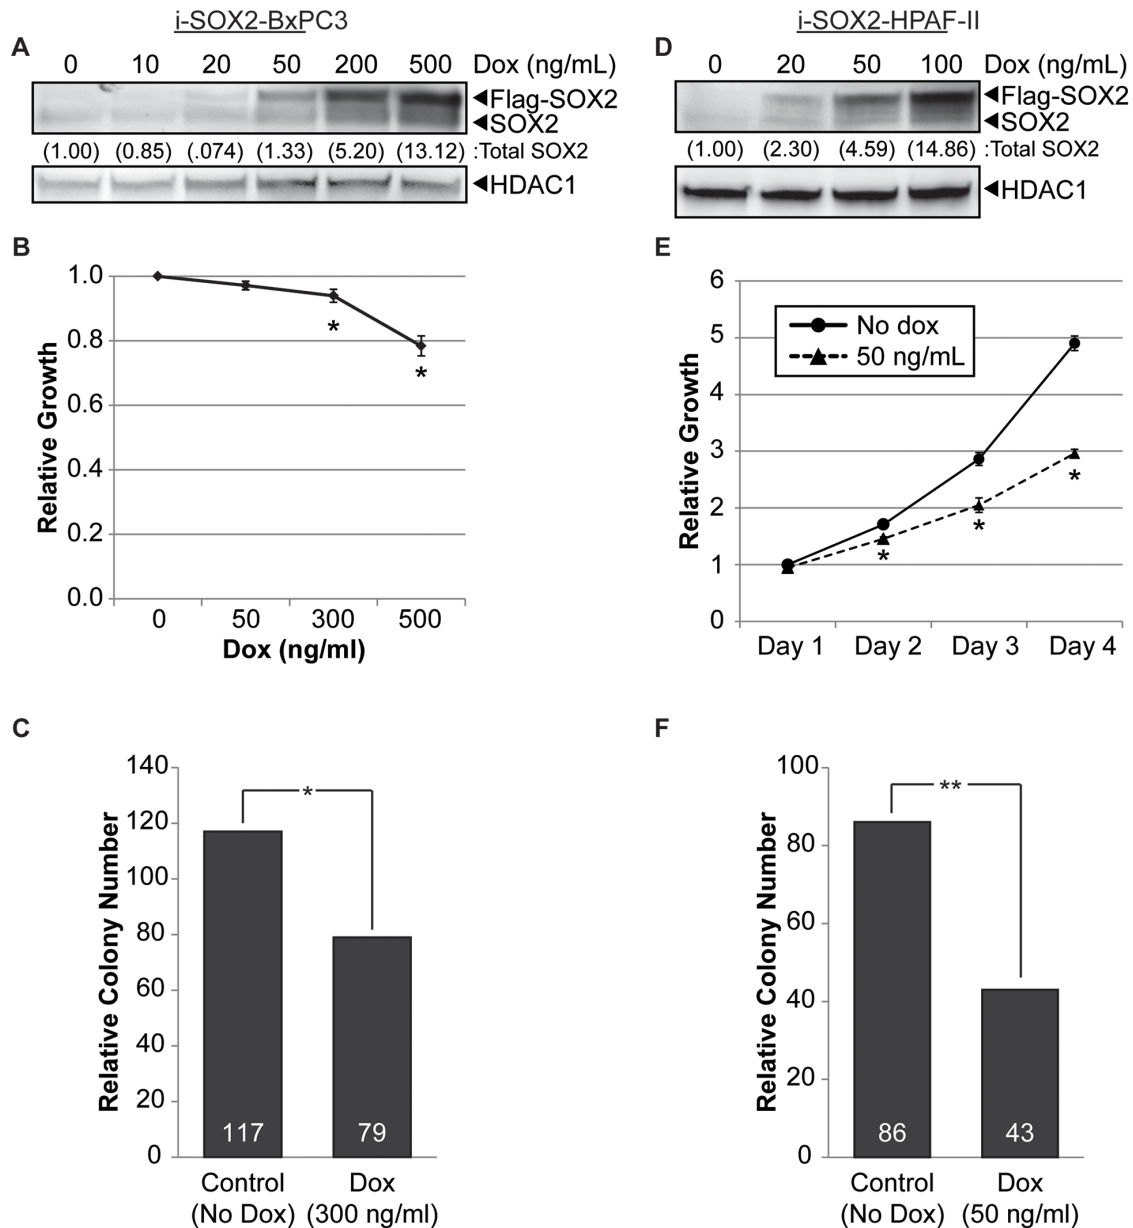

**Supplementary Figure S1: Overexpression of SOX2 in PDAC cells reduces cellular proliferation.** **A.** Western blot analysis of SOX2 expression in whole cell extracts from i-SOX2-BxPC3 cells following 3 days of Dox-induction of the transgene. The overexpression of Flag-SOX2 was compared to endogenous SOX2. HDAC1 protein was used as a loading control. **B.** Proliferation of i-SOX2-BxPC3 cells was determined by MTT assay following 4 days growth at the indicated Dox concentrations. Growth in the absence of Dox was set to 1. **C.** Clonal growth of i-SOX2-BxPC3 cells was determined after 8 days in the presence or absence of Dox (300 ng/ml). **D.** Western blot analysis of SOX2 expression in whole cell extracts from i-SOX2-HPAF-II cells following 2 days of Dox-treatment. The overexpression of Flag-SOX2 was compared to endogenous SOX2. HDAC1 protein was used as a loading control. **E.** Growth of i-SOX2-HPAF-II cells over 4 days was determined by MTT assay following growth in the presence or absence of Dox (50 ng/ml). **F.** Clonal growth of i-SOX2-HPAF-II cells was determined after 8 days in the presence or absence of Dox (50 ng/ml). Error bars represent standard deviation; statistical significance was determined by student's t-test (\* $p < 0.05$ , \*\* $p < 0.01$ ). The studies shown in A, C, D, and F were repeated and similar results were obtained.

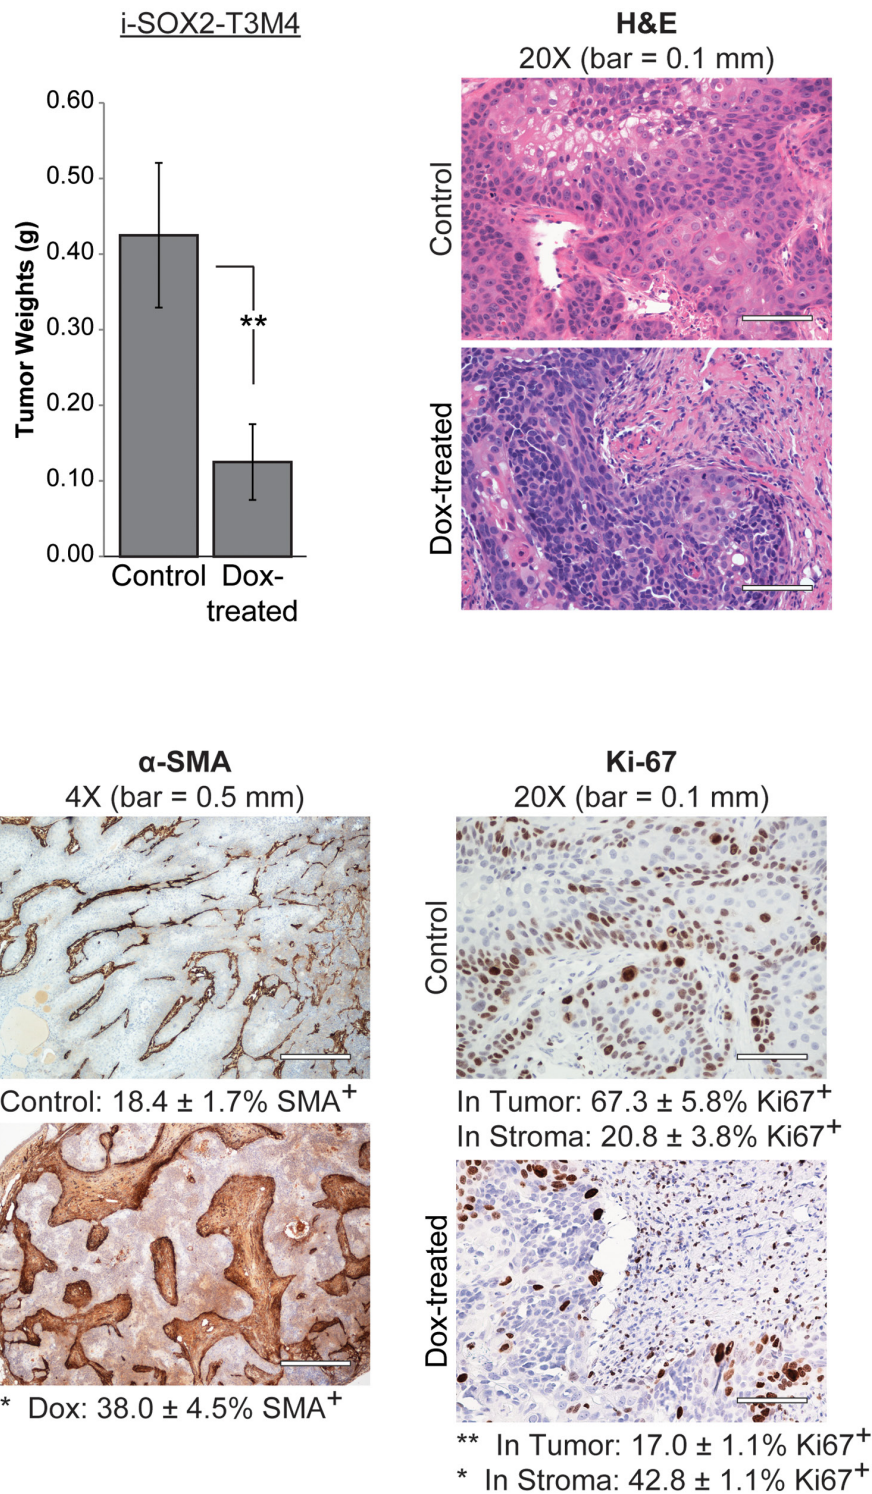

**Supplementary Figure S2: Overexpression of SOX2 in i-SOX2-T3M4 cells reduces subcutaneous tumor growth.** A. Tumor weights were measured following excision after a total 19 days of tumor growth. Subcutaneous tumor sections were stained and quantified for B. H&E, C. SMA, and D. Ki-67 as described in the Materials and Methods. Error bars represent standard deviation; statistical significance was determined by student's t-test (\* $p < 0.05$ , \*\* $p < 0.01$ ).

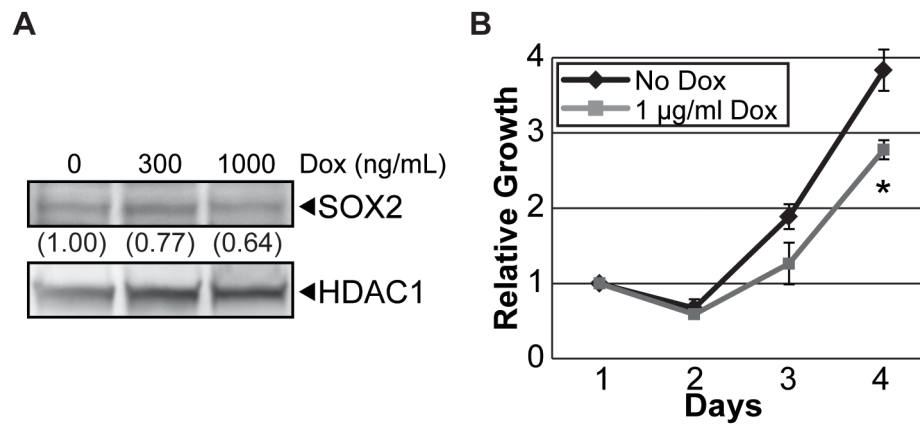

**Supplementary Figure S3: Knockdown of SOX2 with a second shRNA vector cells reduces cellular growth.** **A.** Western blot analysis of SOX2 was performed using whole cell extracts from T3M4 cells engineered with a second shRNA targeting SOX2 following 2 days of Dox-induction. The level of SOX2 was compared to that in the untreated sample and HDAC1 protein was used as a loading control. **B.** Proliferation of T3M4 cells engineered with the second SOX2 shRNA in the presence or absence of Dox (1 µg/ml) over a 4 day period was determined by MTT assays. Error bars represent standard deviation and p values were determined by student's t-test (\*p<0.05).

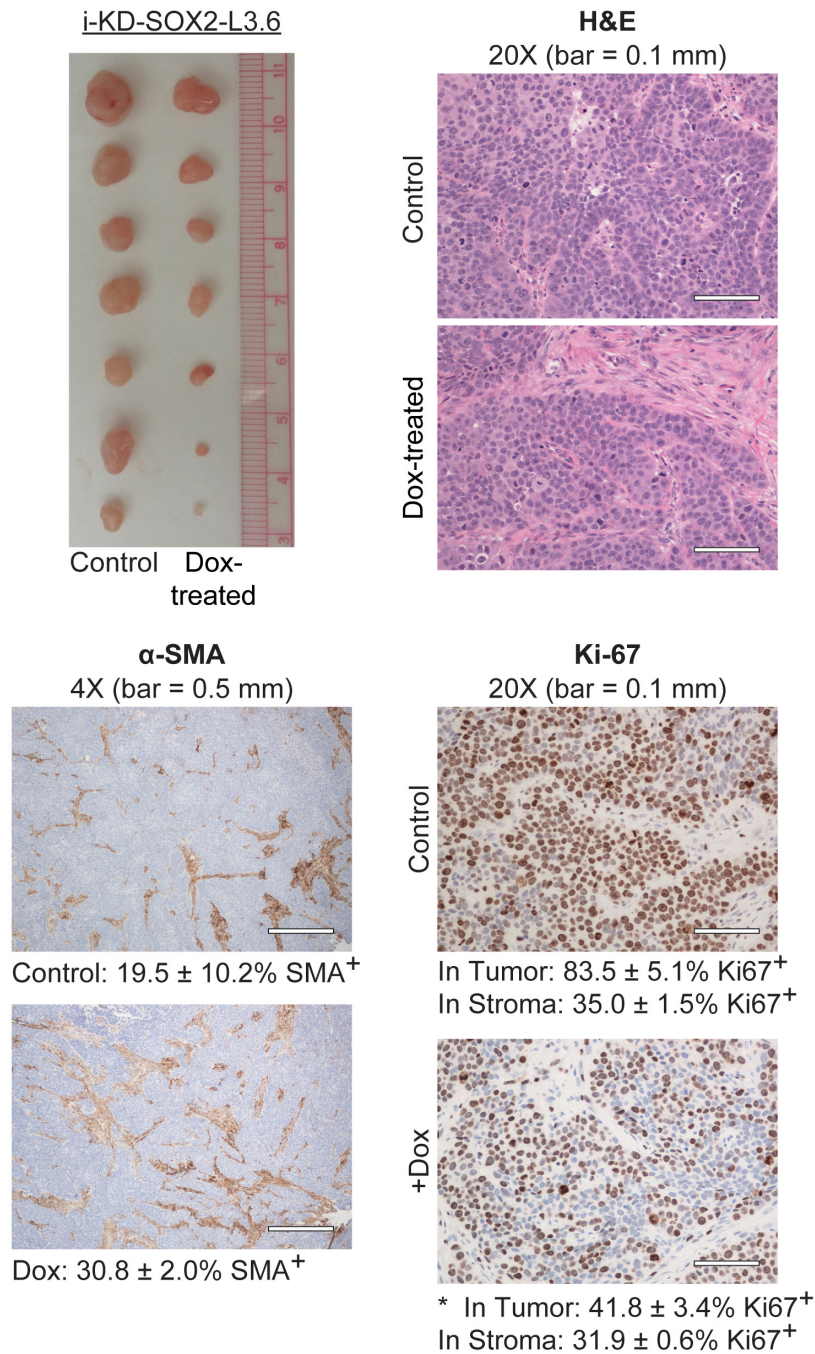

**Supplementary Figure S4: Knockdown of SOX2 in i-KD-SOX2-L3.6 cells reduces subcutaneous tumor growth.** A. Tumor were excised after a total 15 days of tumor growth. Subcutaneous tumor sections were stained for B. H&E, C. SMA, and D. Ki-67 as described in the Materials and Methods. Staining was quantified and statistical significance was determined by student's t-test (\* $p < 0.05$ , \*\* $p < 0.01$ ).

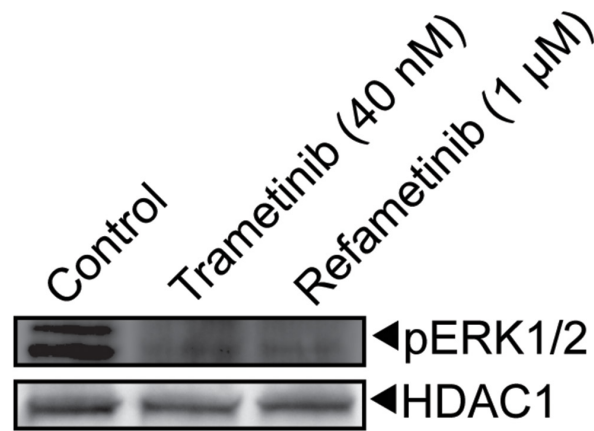

**Supplementary Figure S5: Phosphorylation of ERK is suppressed following MEK inhibition.** Western blot analysis of ERK phosphorylation in whole cell extracts from i-SOX2-T3M4 cells treated with the MEK inhibitors trametinib and refametinib for 48 hours at their EC<sub>50</sub>. HDAC1 protein was used as a loading control.

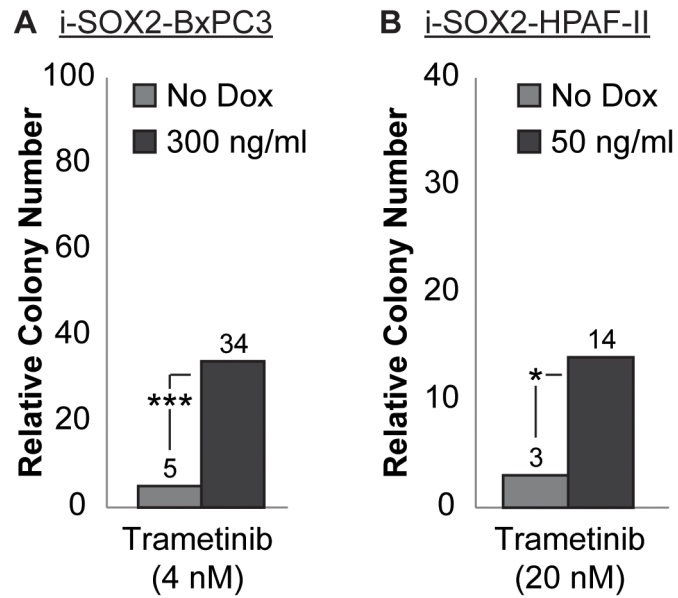

**Supplementary Figure S6: Cloning efficiency of PDAC cells is reduced by treatment with trametinib and partially reversed by overexpression of SOX2.** I-SOX2-BxPC3 **A.** and i-SOX2-HPAF-II **B.** cells were subcultured at 80 cells per cm<sup>2</sup>. After 8 days treatment with trametinib (4 nM and 20 nM, respectively) in the presence or absence of Dox (300 ng/ml and 50 ng/ml, respectively) colony numbers were determined. Statistical significance was determined by student's t-test (\*p<0.05, \*\*\*p<0.005). The studies shown in A and B were repeated and similar results were obtained.

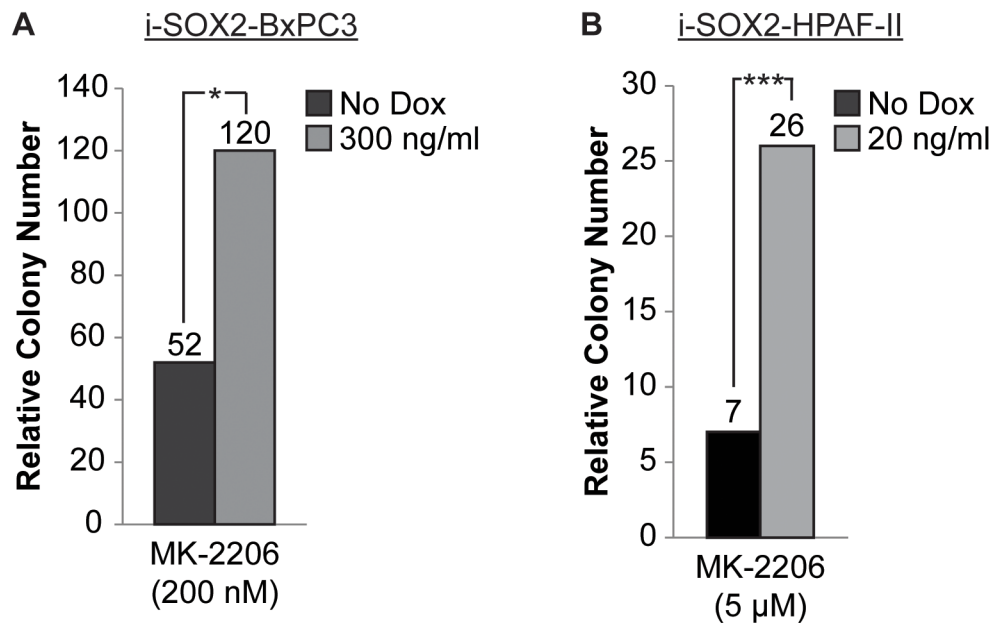

**Supplementary Figure S7: Cloning efficiency of PDAC cells is reduced by treatment with MK-2206 and partially reversed by overexpression of SOX2.** A. Clonal growth was determined by subculturing i-SOX2-BxPC3 A. and i-SOX2-HPAF-II B. cells at 80 cells per cm<sup>2</sup>. After 8 days treatment with MK-2206 (200 nM and 5 μM, respectively) in the presence or absence of Dox colony numbers were determined. Statistical significance was determined by student's t-test (\*p<0.05, \*\*\*p<0.005). The studies shown in A and B were repeated and similar results were obtained.

Supplementary Table S1 : Inhibitors used and the EC<sub>50</sub> for each drug

| Inhibitor Name             | Target | Company,<br>Location            | T3M4   | HPAF-II | BxPC3  | L3.6  |
|----------------------------|--------|---------------------------------|--------|---------|--------|-------|
| GSK-1120212,<br>trametinib | MEK    | Selleck,<br>Houston, TX         | 40 nM  | 20 nM   | 4 nM   | 4 nM  |
| AZD-6244,<br>selumetinib   | MEK    | Selleck,<br>Houston, TX         | 10 μM  | ND      | ND     | ND    |
| RDEA-119,<br>refametinib   | MEK    | Active<br>BioChem, Hong<br>Kong | 1 μM   | ND      | ND     | ND    |
| GDC-0623                   | MEK    | Active<br>BioChem, Hong<br>Kong | 20 nM  | ND      | ND     | ND    |
| GDC-0973,<br>cobimetinib   | MEK    | Active<br>BioChem, Hong<br>Kong | 200 nM | ND      | ND     | ND    |
| MK-2206                    | AKT    | Selleck,<br>Houston, TX         | 2 μM   | 5 μM    | 200 nM | 80 nM |

\*ND, not determined
